# Supplementary material
Source: PubMed Central journal article supplement (PMC7709964)
Supplement: NIHMS1647640-supplement-1.pdf [file NIHMS1647640-supplement-1.pdf]

**Cell Reports, Volume 33**

**Supplemental Information**

**RACK1 Mediates NLRP3 Inflammasome**

**Activation by Promoting NLRP3 Active**

**Conformation and Inflammasome Assembly**

**Yanhui Duan, Lingzhi Zhang, Diego Angosto-Bazarra, Pablo Pelegrín, Gabriel Núñez, and Yuan He**

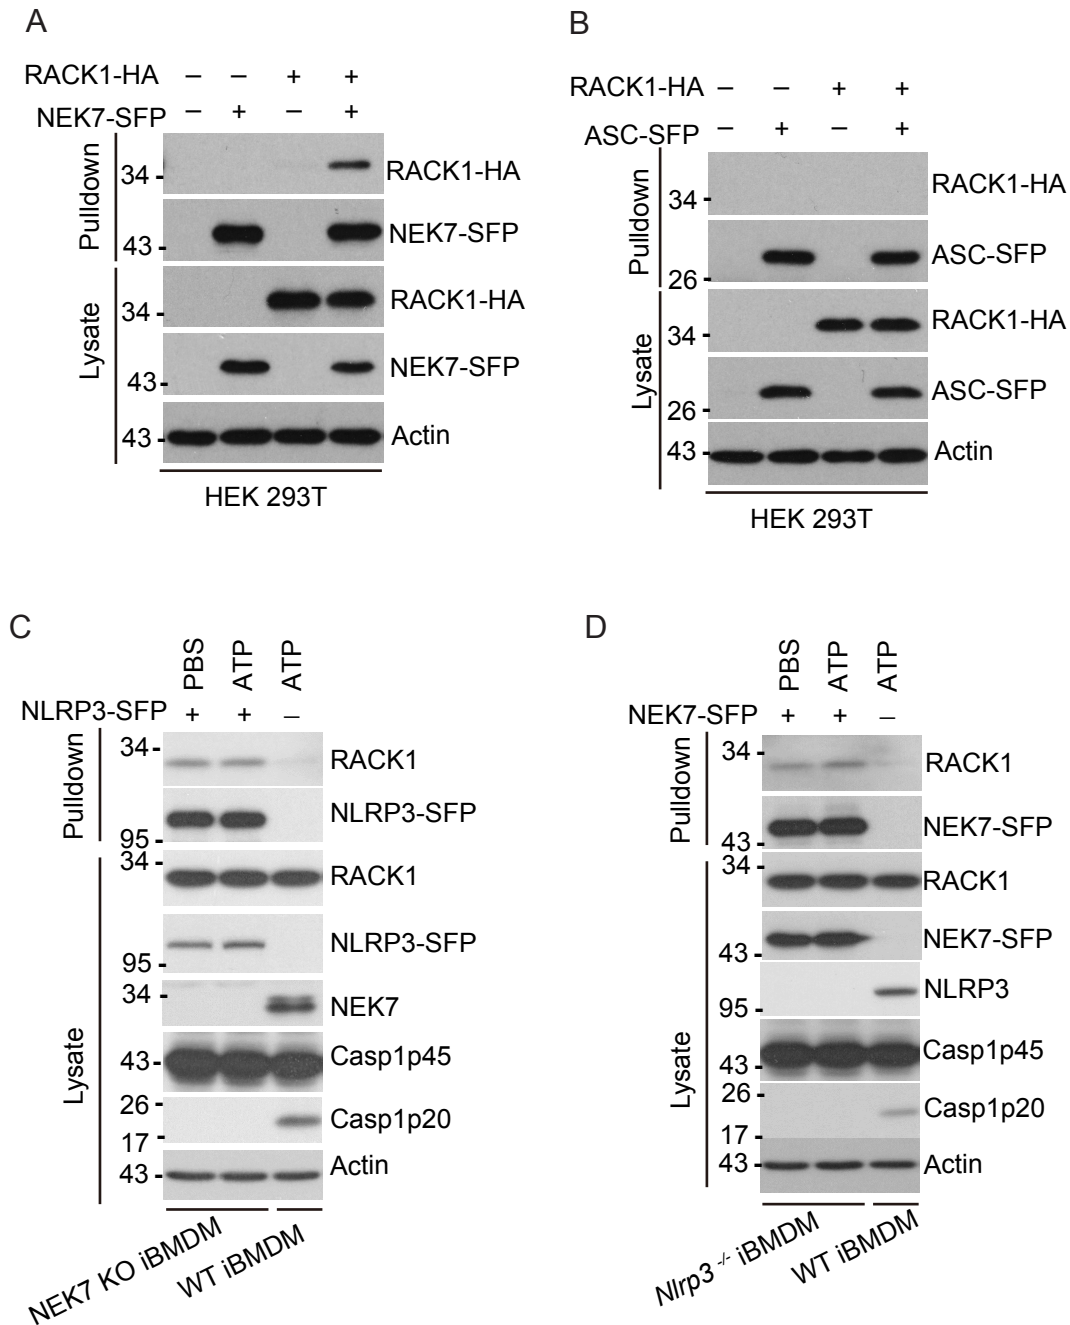

**Figure S1. RACK1 interacts with NLRP3 or NEK7 but not ASC. Related to Figure 1.** (A) Tagged NEK7 (NEK7-SFP), RACK1(RACK1-HA) or both were expressed in HEK293T cells. (B) Tagged ASC (ASC-SFP), RACK1-HA, or both were expressed in HEK 293T cells. (C) NLRP3-SFP was expressed in NEK7 KO iBMDM after lentiviral transduction. Cells were primed with LPS (200 ng mL<sup>-1</sup>, 4 h) and then stimulated with PBS (control) or ATP (5 mM, 30 min). (D) NEK7-SFP was expressed in immortalized *Nlrp3*<sup>-/-</sup> iBMDM after lentiviral transduction. Cells were primed with LPS (200 ng mL<sup>-1</sup>, 4 h) and then stimulated with PBS (control) or ATP (5 mM, 30 min). Uninfected wild-type (WT) iBMDM were used as a control. SFP-tagged proteins were pulled down by streptavidin beads. The pull-down complexes and cell lysates were analyzed by immunoblotting. Results are representative of three independent experiments.

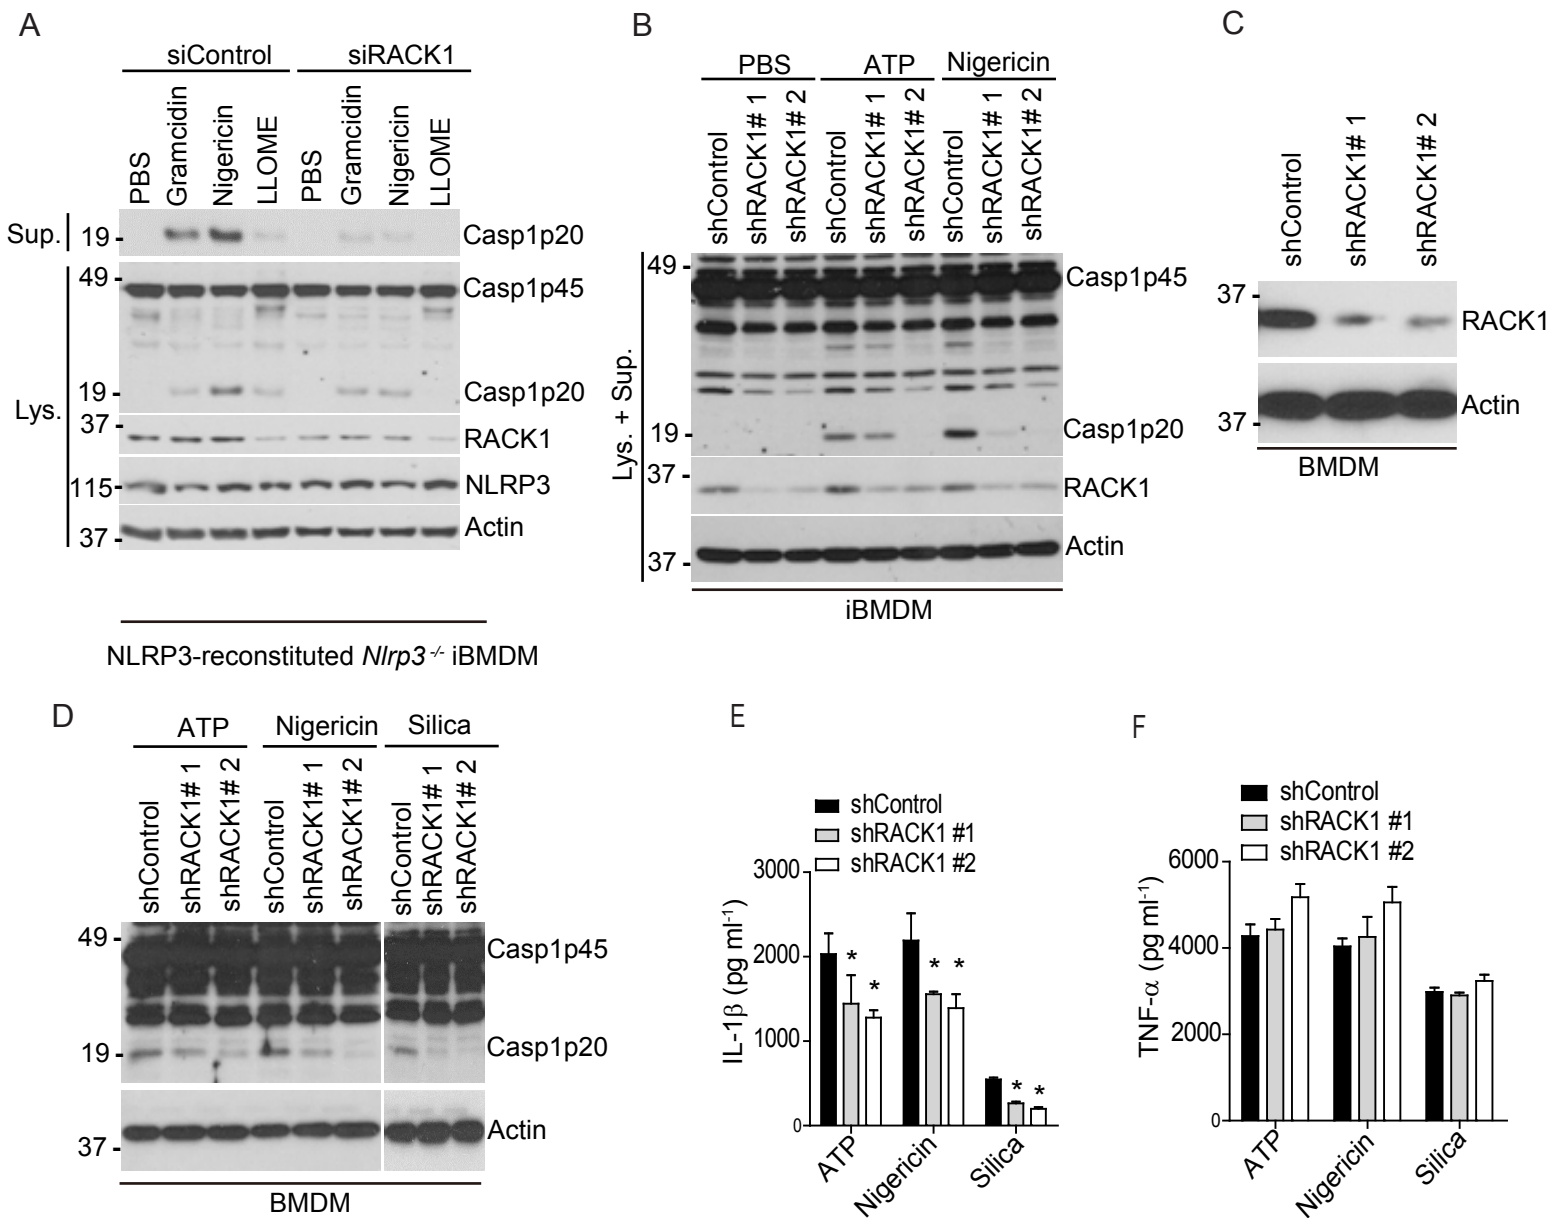

**Figure S2. RACK1 is required for NLRP3 inflammasome activation. Related to Figure 2.** (A) *Nlrp3*<sup>-/-</sup> iBMDM were reconstituted with NLRP3 by lentiviral transduction. Transduced cells were treated with control siRNA (siControl) or RACK1 siRNA (siRACK1) and then stimulated with PBS (control), gramicidin (0.5  $\mu$ M, 1 h), nigericin (5  $\mu$ M, 1 h) or LLOMe (2  $\mu$ M, 4 h). Culture supernatants (Sup.) and cell lysates (Lys.) were immunoblotted with indicated antibodies. (B) iBMDM were treated with control shRNA (shControl), shRACK1 #1 or shRACK1 #2, and then stimulated with LPS (200 ng mL<sup>-1</sup>, 4 h) plus PBS (control), ATP (5 mM, 30 min) or nigericin (5  $\mu$ M, 1 h). Mixtures of culture supernatants and cell lysates were analyzed for caspase-1 activation by immunoblotting. Wild-type BMDM were treated with control shRNA (shControl), shRACK1 #1 or shRACK1 #2, and then stimulated with LPS (200 ng mL<sup>-1</sup>, 4 h) plus ATP (5 mM, 30 min), nigericin (5  $\mu$ M, 1 h) or silica (500  $\mu$ g mL<sup>-1</sup>, 4 h). Cell lysates were collected and analyzed for RACK1 expression (C) or caspase-1 activation (D) by immunoblotting. IL-1 $\beta$  (E) and TNF- $\alpha$  (F) in culture supernatants were analyzed by ELISA. Error bars denote s.d. of triplicate wells. Student's t-test. \* $p$  < 0.05. Results are representative of three independent experiments.

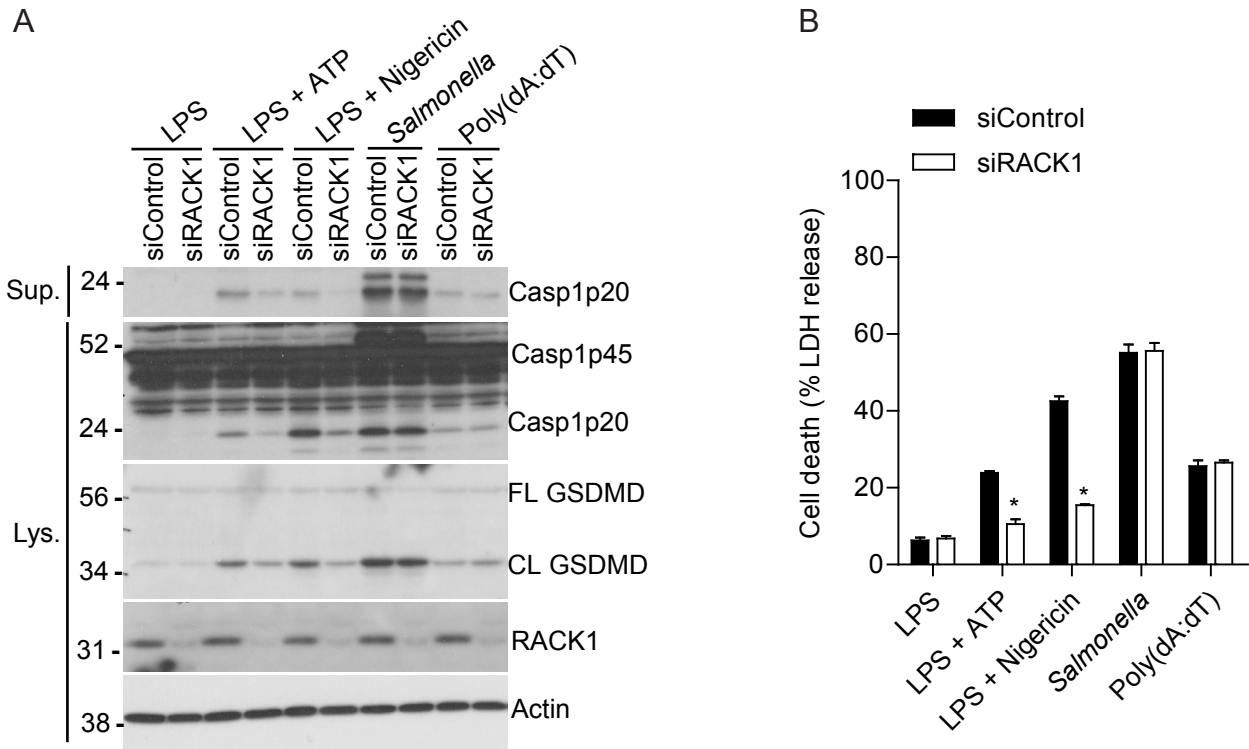

**Figure S3. RACK1 specifically promotes NLRP3 stimuli-induced caspase-1 activation, GSDMD cleavage, and cell death. Related to Figure 2.** iBMDMs were treated with control siRNA (siControl) or RACK1 siRNA (siRACK1) and then stimulated with LPS (200 ng mL<sup>-1</sup>, 4 h), LPS (200 ng mL<sup>-1</sup>, 4 h) plus ATP (5 mM, 30 min), LPS (200 ng mL<sup>-1</sup>, 4 h) plus nigericin (5 μM, 1 h), *Salmonella* (m.o.i=10, 1 h), or Poly(dA:dT) (2 μg mL<sup>-1</sup>, 4 h). Culture supernatants (Sup.) and cell lysates (Lys.) were immunoblotted with indicated antibodies (A). Death of macrophages was measured as the release of LDH into culture supernatants (B). Error bars in B denote s.d. of triplicate wells. Student's t-test. \**p* < 0.05. Results are representative of three independent experiments.

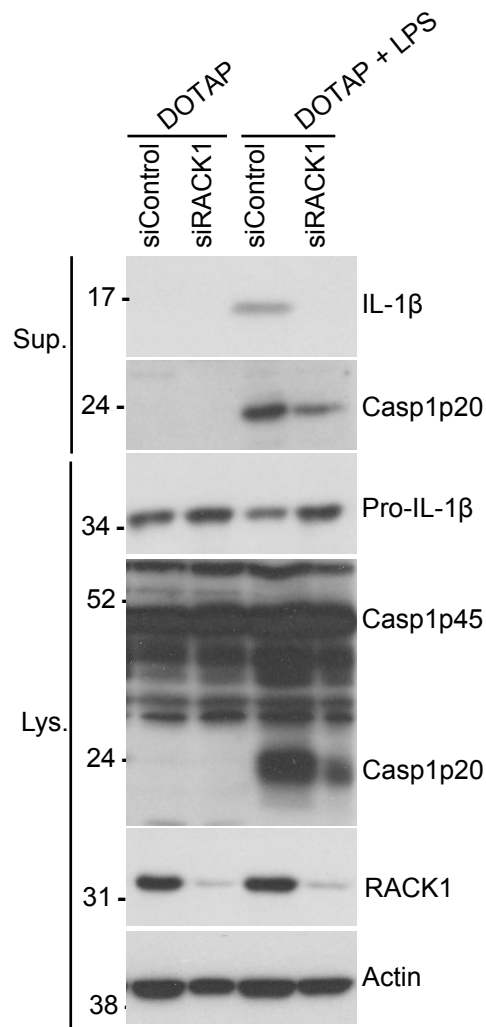

**Figure S4. RACK1 knockdown inhibits caspase-1 activation and IL-1 $\beta$  maturation induced by cytosolic LPS in macrophages. Related to Figure 2.** Control siRNA (siControl) or RACK1 siRNA (siRACK1)-treated iBMDM were primed with Pam3CSK4 (300 ng mL<sup>-1</sup>, 6 h) and then transfected with DOTAP alone or DOTAP plus LPS (1  $\mu$ g mL<sup>-1</sup>, 4 h). Cell lysates (Lys.) and supernatants (Sup.) were collected and analyzed by immunoblotting with indicated antibodies. Results are representative of three independent experiments.

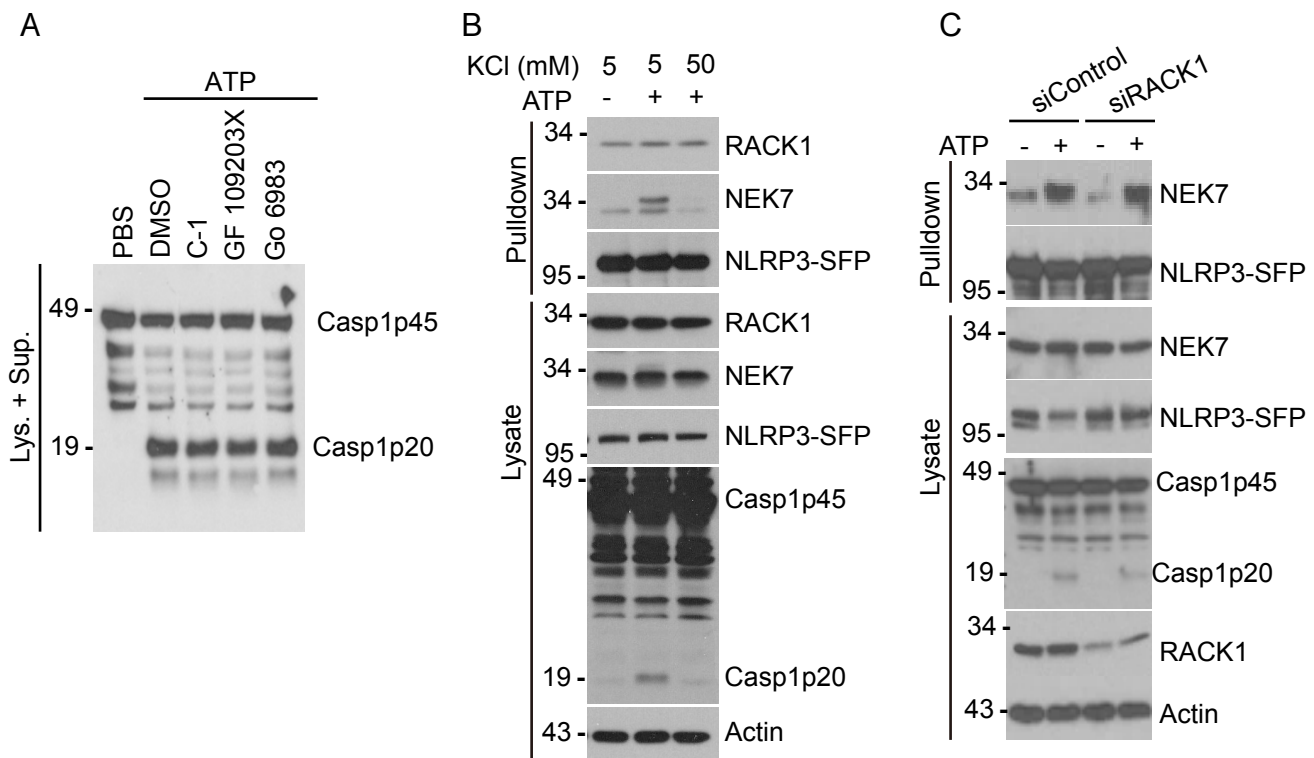

**Figure S5. RACK1 promotes NLRP3 inflammasome activation independently of PKC kinase activity and potassium efflux, and RACK1 depletion does not affect the NLRP3-NEK7 interaction. Related to Figure 5.** (A) LPS-primed BMDM were stimulated with PBS (control) or ATP (5 mM, 30 min) after 1 h-pretreatment with vehicle control (DMSO), PKC inhibitor C-1 (10  $\mu$ M), GF 109203X (10  $\mu$ M) or Go 6983 (10  $\mu$ M). Mixtures of cell lysates and supernatants (Lys. + Sup.) were collected and analyzed for caspase-1 activation. (B) LPS-primed NLRP3-reconstituted *Nlrp3*<sup>-/-</sup> iBMDM were left unstimulated or stimulated with ATP (5 mM, 30 min) in the presence of low extracellular potassium (5 mM) or high extracellular potassium (50 mM). NLRP3-SFP was pulled down by streptavidin beads. The pulldown complexes and cell lysates were analyzed by immunoblotting. (C) NLRP3-reconstituted *Nlrp3*<sup>-/-</sup> iBMDM were treated with control siRNA (siControl) or RACK1 siRNA (siRACK1), and then stimulated with LPS (200 ng mL<sup>-1</sup>) or LPS (200 ng mL<sup>-1</sup>) plus ATP (5 mM, 30 min). The NLRP3 pulldown complexes and cell lysates were analyzed by immunoblotting. Results are representative of three independent experiments.

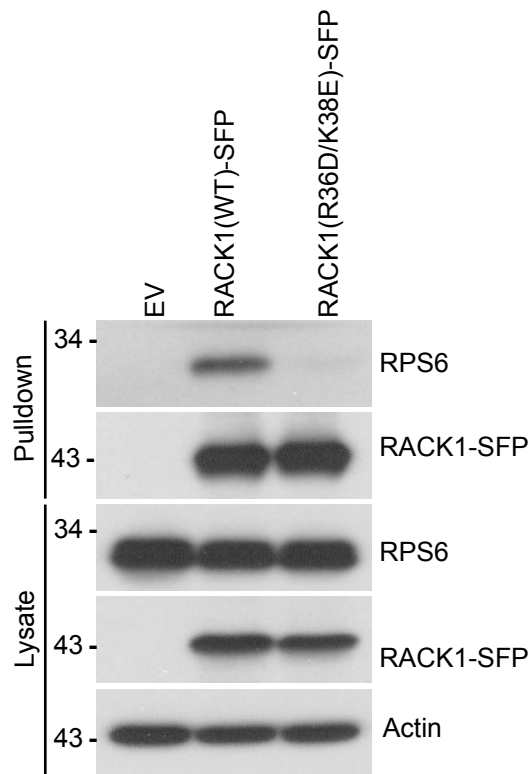

**Figure S6. Mutant RACK1 (R36D/K38E) fails to associate with the 40S ribosomal subunit. Related to Figure 5.** HEK 293T cells were transfected with empty vector (EV), vector expressing SFP-tagged wild-type RACK1 (WT) or mutant RACK1 (R36D/K38E) for 18 h. RACK1-SFP complexes were pulled down with streptavidin beads and analyzed by immunoblotting with indicated antibodies. Results are representative of two independent experiments.
